# Supplementary material
Source: PubMed Central journal article supplement (PMC4267400)
Supplement: pnas.201419632SI.pdf [file pnas.201419632SI.pdf]

# Supporting Information

Pétriz et al. 10.1073/pnas.1419632111

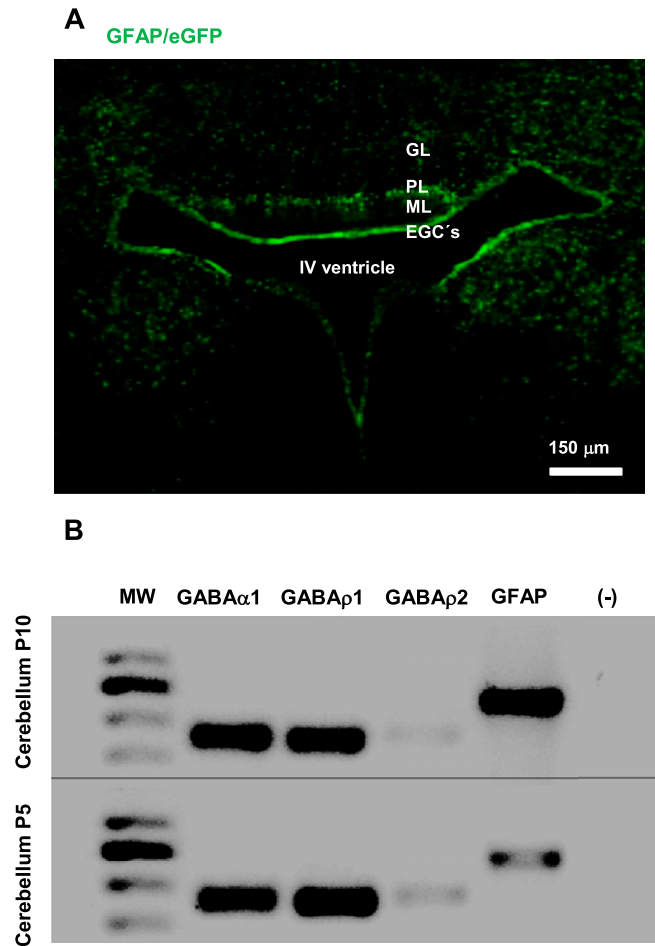

**Fig. S1.** (A) Coronal slice (40  $\mu$ m thick) of cerebellum showing the location of EGCs that face the fourth ventricle and the distribution of cerebellar GFAP<sup>+</sup> cells in this area. PL, Purkinje layer; ML, molecular layer; 4V, fourth ventricle. (B) mRNA expression of GABA $\alpha$ 1, GABA $\gamma$ 2, GABA $\rho$ 1, GABA $\rho$ 2, and GFAP in cerebellum from P5 and P10 mice.

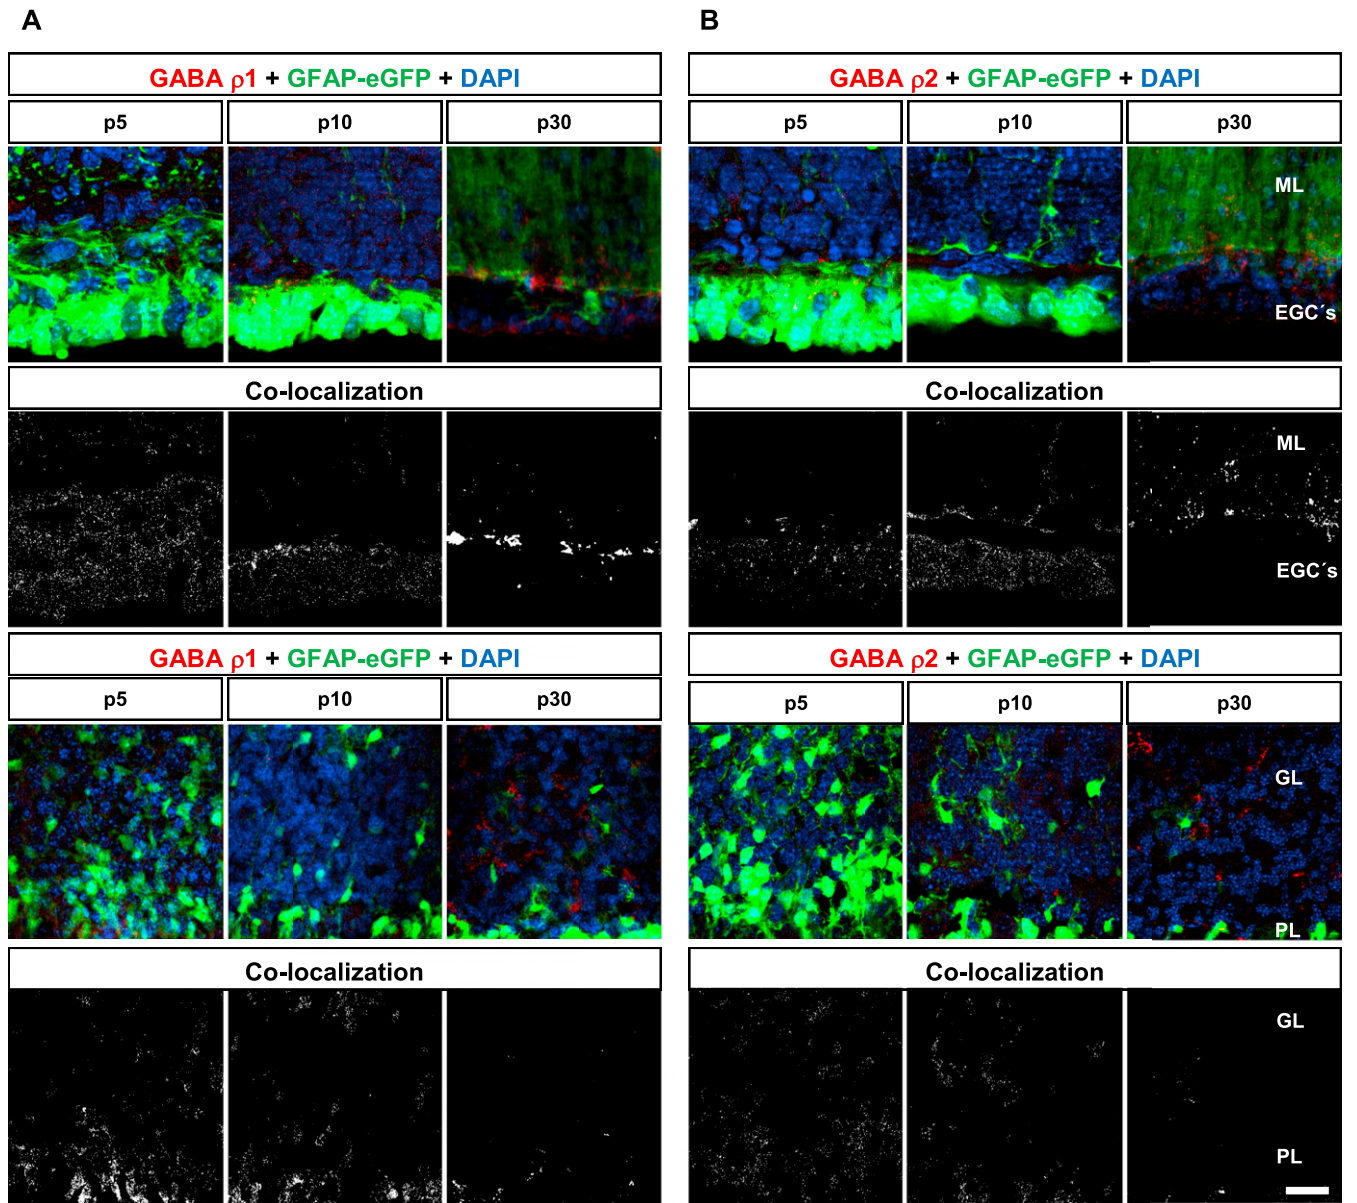

**Fig. 52.** (A) Localization of GABA $\rho$ 1 (red) in GFAP $^{+}$  cells (green) in P5, P10, and P30 mice. White dots indicate the colocalization pattern over time in EGCs and in GFAP cells of the GL. (B) Colocalization of GABA $\rho$ 2 (red) and GFAP $^{+}$  cells (green) in P5, P10, and P30 mice is higher at P5 than at P10 or P30. ML, molecular layer; PL, Purkinje layer. (Scale bar: 50  $\mu$ m.)

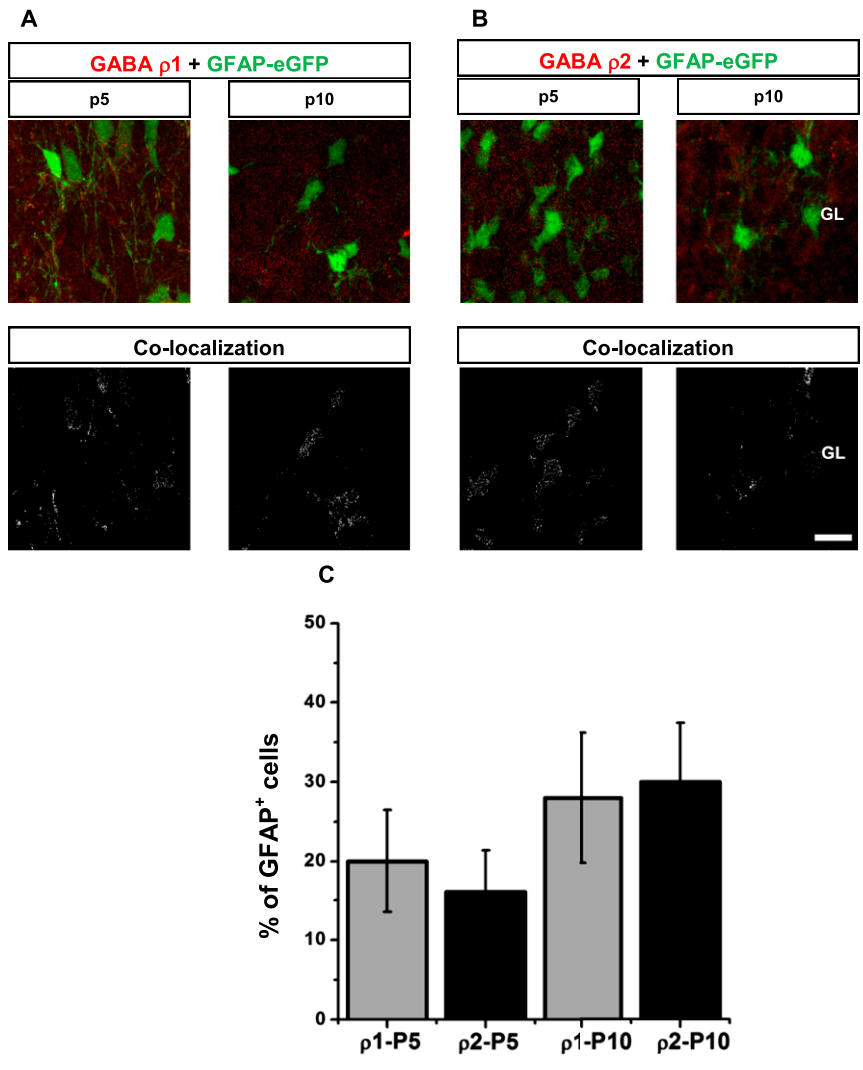

**Fig. 53.** (A and B) Colabeling of GABAρ1 or GABAρ2 with GFAP+ cells from the GL of cerebellum at P5 and P10. (C) Percentage of GFAP+ cells from the GL that express GABAρ1 and GABAρ2 at P5 and P10. *n* = 3. (Scale bar: 20 μm.)

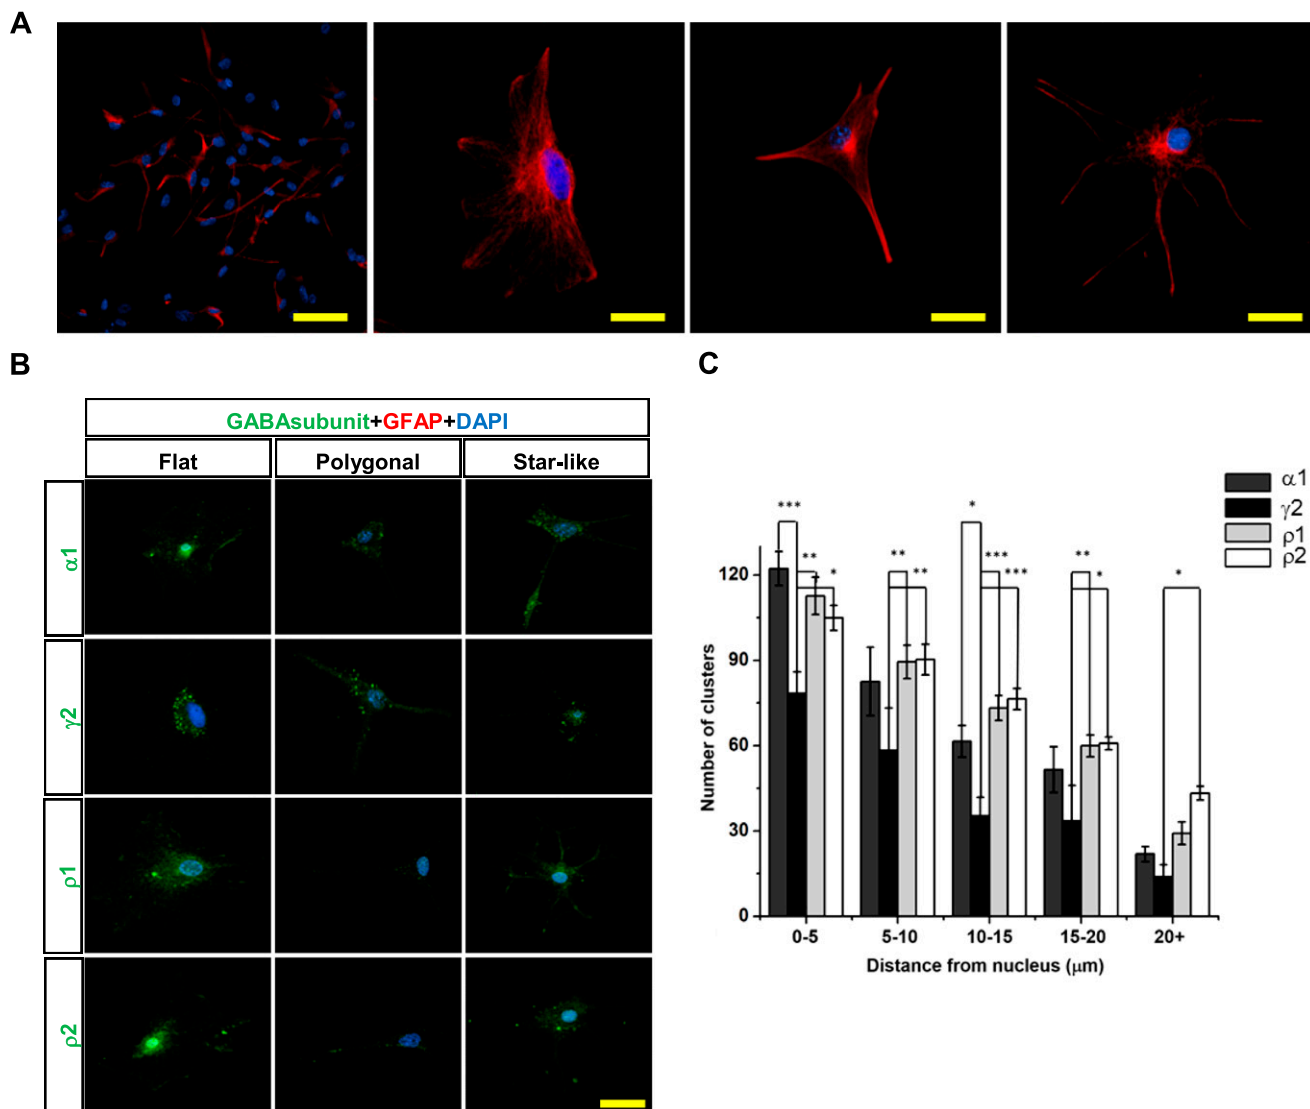

**Fig. S4.** (A) Morphologies of GFAP<sup>+</sup> cells in primary culture. From left to right, panoramic view of cerebellar cells in culture and examples of flat, polygonal, and star-like cells. (B) Distribution of GABA $\alpha$ 1, GABA $\gamma$ 2, GABA $\rho$ 1, and GABA $\rho$ 2 in GFAP<sup>+</sup> cells in culture. Nuclei were stained with DAPI (blue). (Scale bars: 50 and 20  $\mu$ m.) (C) Distribution of GABA subunit fluorescent clusters. GABA $\gamma$ 2 was significantly different from that of the other subunits.  $n = 18$  cells. \*\*\* $P < 0.001$ ; \*\* $P < 0.01$ ; \* $P < 0.05$ .

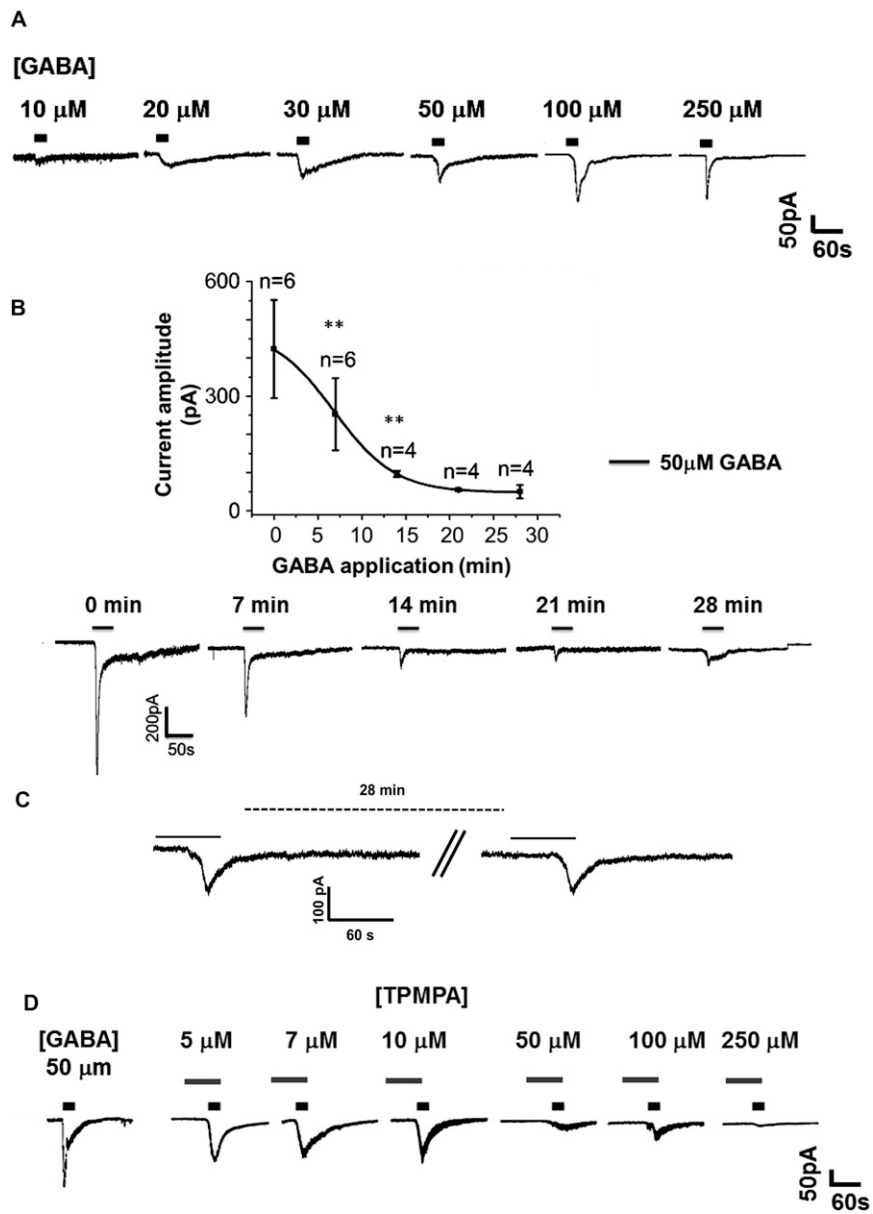

**Fig. 55.** (A) Sample recordings of GABA responses from astrocytes in culture. (B) GABA-desensitization curve after repeated applications of 50  $\mu\text{M}$  GABA. Note the nondesensitizing component remaining after 28 min. (C) GABA responses after two applications of GABA 50  $\mu\text{M}$  and 28 min of washing perfusion. (D) Sample recordings of GABA responses blocked by increasing concentrations of TPMPA.  $n = 6$  cells for application.

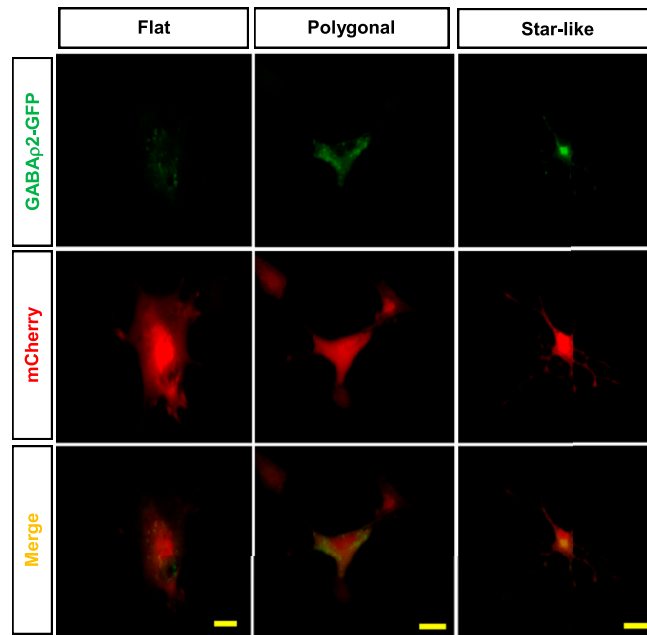

Fig. S6. Fluorescence emitted by GABA $\rho$ 2-GFP (green) and soluble mCherry (red) in flat, polygonal, and star-like cells in culture. (Scale bar: 25  $\mu$ m.)

**Table S1. Antibodies for immunofluorescence, immunogold, and Western blot analyses**

| Antibody                                      | Company                      | Catalog no. | Use        |
|-----------------------------------------------|------------------------------|-------------|------------|
| <b>Primary antibodies</b>                     |                              |             |            |
| Rabbit IgG anti-GABA $\alpha$ 1               | Millipore                    | 06-868      | WB, IF     |
| Rabbit IgG anti-GABA $\alpha$ 1-6             | Santa Cruz Biotechnology     | sc-14005    | WB, IF     |
| Rabbit IgG anti-GABA $\rho$ 1                 | Santa Cruz Biotechnology     | sc-25707    | WB, IF, IG |
| Goat IgG anti-GABA $\rho$ 1                   | Santa Cruz Biotechnology     | sc-21338    | WB, IF     |
| Goat IgG anti-GABA $\rho$ 2                   | Santa Cruz Biotechnology     | sc-30254    | WB, IF     |
| Goat IgG anti-GFAP                            | Santa Cruz Biotechnology     | sc-6171     | WB, IF     |
| Guinea pig anti-GABA $\gamma$ 2               | Synaptic Systems             | 224004      | IF         |
| <b>Secondary antibodies</b>                   |                              |             |            |
| Goat anti-rabbit IgG EM-grade 25 nm           | Electron Microscopy Sciences | 25116       | IG         |
| Rabbit anti-goat IgG-AP                       | Santa Cruz Biotechnology     | sc-2771     | WB         |
| Goat anti-rabbit IgG-AP                       | Santa Cruz Biotechnology     | sc-2034     | WB         |
| Alexa Fluor 594-conjugated donkey anti-goat   | Molecular Probes             | A-11058     | IF         |
| Alexa Fluor 594-conjugated donkey anti-rabbit | Molecular Probes             | R37119      | IF         |
| Alexa Fluor 488-conjugated donkey anti-rabbit | Molecular Probes             | R37118      | IF         |

IF, immunofluorescence; IG, immunogold; WB, Western blot.

**Table S2. Primers for RT-PCR GABA-A subunits and GFAP detection**

| Gene                            | Primer                         |                                 | Product, pb |
|---------------------------------|--------------------------------|---------------------------------|-------------|
|                                 | Forward                        | Reverse                         |             |
| <i>GABA<math>\alpha</math>1</i> | 5'-tatggacagccctccaagatgaac-3' | 5'-catatcgtggtctgaaactggtcgg-3' | 177         |
| <i>GABA<math>\gamma</math>2</i> | 5'-tgccaaaacctggtatgacagacg-3' | 5'-taactggagaactccagggggcagg-3' | 289         |
| <i>GABA<math>\rho</math>1</i>   | 5'-cgaggagcacacgacgatgcc-3'    | 5'-ctgcacatccacgcccacagg-3'     | 197         |
| <i>GABA<math>\rho</math>2</i>   | 5'-cctgatggctctcgtggagag-3'    | 5'-ccaaggctggcctcatggtg-3'      | 197         |
| <i>GFAP</i>                     | 5'-agccagcagagcagggcagg-3'     | 5'-tctctgcacgctcctcggcc-3'      | 239         |
